# Supplementary material
Source: MDPI journal article supplement (https://www.mdpi.com/2073-4395/12/6/1470)
Supplement: s1 [file s1]

**Table S1.** Phenotypic variation for the total soluble sugar (TSS) in two years.

| Trait | Year | Max   | Min  | Mean | Median | Range | SD   | CV   |
|-------|------|-------|------|------|--------|-------|------|------|
| TSS   | 2019 | 13.62 | 0.76 | 5.68 | 5.10   | 12.86 | 3.23 | 56.8 |
|       | 2020 | 13.99 | 0.58 | 5.71 | 5.14   | 13.41 | 3.25 | 56.9 |

TSS, the total soluble sugar; Max, maximum; Min, minimum; SD, standard deviation; CV, coefficient variations.

**Table S2.** Candidate genes on Chromosome.06.

| Gene ID         | Strat (bp) | Stop (bp) | Sequence size (bp) | Annotation                                                   |
|-----------------|------------|-----------|--------------------|--------------------------------------------------------------|
| Glyma.06g146400 | 11943415   | 11949660  | 6245               | disproportionating enzyme                                    |
| Glyma.06g146500 | 11950838   | 11952275  | 1437               | SKP1 interacting partner 6                                   |
| Glyma.06g146600 | 11952842   | 11954841  | 1999               | shikimate kinase 1                                           |
| Glyma.06g146700 | 11959117   | 11966238  | 7121               | GTP-binding protein-related                                  |
| Glyma.06g146800 | 11967059   | 11970246  | 3187               | Sorbin/SH3 domain protein                                    |
| Glyma.06g146900 | 11976434   | 11981407  | 4973               | general control non-repressible 5                            |
| Glyma.06g147000 | 11982014   | 11985343  | 3329               | programmed cell death 2 C-terminal domain-containing protein |
| Glyma.06g147100 | 11987432   | 11990961  | 3529               | Sorbin/SH3 domain protein                                    |
| Glyma.06g147200 | 12001359   | 12002138  | 779                | /                                                            |
| Glyma.06g147300 | 12005208   | 12007509  | 2301               | O-Glycosyl hydrolases family 17 protein                      |
| Glyma.06g147400 | 12008717   | 12012895  | 4178               | Tetratricopeptide repeat (TPR)-like superfamily protein      |
| Glyma.06g147500 | 12032628   | 12036170  | 3542               | WRKY DNA-binding protein 13                                  |
| Glyma.06g147600 | 12052122   | 12056526  | 4404               | Leucine-rich receptor-like protein kinase family protein     |
| Glyma.06g147700 | 12068339   | 12068644  | 305                |                                                              |
| Glyma.06g147800 | 12070691   | 12076927  | 6236               | Nucleotide-sugar transporter family protein                  |
| Glyma.06g147900 | 12081868   | 12087436  | 5568               | Protein kinase superfamily protein                           |
| Glyma.06g148000 | 12089141   | 12089765  | 624                | Protein of unknown function (DUF3511)                        |
| Glyma.06g148100 | 12098930   | 12100315  | 1385               | /                                                            |
| Glyma.06g148200 | 12108718   | 12109284  | 566                | /                                                            |
| Glyma.06g148300 | 12113168   | 12118836  | 5668               | 26S proteasome regulatory subunit, putative (RPN5)           |
| Glyma.06g148400 | 12120448   | 12122659  | 2211               | Integrase-type DNA-binding superfamily protein               |
| Glyma.06g148500 | 12136375   | 12141342  | 4967               | ribonucleotide reductase 1                                   |
| Glyma.06g148600 | 12143950   | 12148364  | 4414               | like COV 2                                                   |
| Glyma.06g148700 | 12149262   | 12156679  | 7417               | Splicing factor, CC1-like                                    |
| Glyma.06g148800 | 12157484   | 12161057  | 3573               | Alba DNA/RNA-binding protein                                 |
| Glyma.06g148900 | 12161540   | 12162106  | 566                | /                                                            |

**Table S3.** Candidate genes on Chromosome.15.

| Gene ID         | Strat<br>(bp) | Stop<br>(bp) | Sequence size<br>(bp) | Annotation                                               |
|-----------------|---------------|--------------|-----------------------|----------------------------------------------------------|
| Glyma.15g133500 | 10727488      | 10735828     | 8340                  | Protein of unknown function (DUF185)                     |
| Glyma.15g133600 | 10739290      | 10743519     | 4229                  | Glycosyl hydrolases family 31 protein                    |
| Glyma.15g133700 | 10744186      | 10748830     | 4644                  | Glycosyl hydrolases family 31 protein                    |
| Glyma.15g133800 | 10754838      | 10756823     | 1985                  | Glycosyl hydrolases family 31 protein                    |
| Glyma.15g133900 | 10760416      | 10762557     | 2141                  | FAD-binding Berberine family protein                     |
| Glyma.15g134000 | 10766247      | 10768012     | 1765                  | HAD superfamily, subfamily IIIB acid phosphatase         |
| Glyma.15g134100 | 10768837      | 10769589     | 752                   | myb domain protein 305                                   |
| Glyma.15g134200 | 10772015      | 10773640     | 1625                  | FAD-binding Berberine family protein                     |
| Glyma.15g134300 | 10777151      | 10779066     | 1915                  | FAD-binding Berberine family protein                     |
| Glyma.15g134400 | 10795047      | 10797469     | 2422                  | Sec14p-like phosphatidylinositol transfer family protein |
| Glyma.15g134500 | 10803856      | 10817438     | 13582                 | toprim domain-containing protein                         |
| Glyma.15g134600 | 10819933      | 10823069     | 3136                  | cytomatrix protein-related                               |
| Glyma.15g134700 | 10827685      | 10828142     | 457                   | Protein with RING/U-box and TRAF-like domains            |
| Glyma.15g134800 | 10831146      | 10833232     | 2086                  | Ribosomal protein L12/ ATP-dependent Clp protease        |
| Glyma.15g134900 | 10834904      | 10838273     | 3369                  | adaptor protein ClpS family protein                      |
| Glyma.15g135000 | 10842068      | 10842582     | 514                   | Major facilitator superfamily protein                    |
| Glyma.15g135100 | 10845919      | 10851256     | 5337                  | polymerase delta 4                                       |
| Glyma.15g135200 | 10854612      | 10861709     | 7097                  | telomere repeat binding factor 1                         |
| Glyma.15g135300 | 10886957      | 10888185     | 1228                  | ent-kaurenoic acid hydroxylase 2                         |
| Glyma.15g135400 | 10891692      | 10894920     | 3228                  | Ubiquitin carboxyl-terminal hydrolase family protein     |
| Glyma.15g135500 | 10899550      | 10905335     | 5785                  | annexin 8                                                |
| Glyma.15g135600 | 10921330      | 10925581     | 4251                  | NAD(P)-binding Rossmann-fold superfamily protein         |
| Glyma.15g135700 | 10946064      | 10948465     | 2401                  | WRKY DNA-binding protein 14                              |
| Glyma.15g135800 | 10949697      | 10959522     | 9825                  | acyl-activating enzyme 7                                 |
| Glyma.15g135900 | 10962970      | 10969792     | 6822                  | cell division control 2                                  |
|                 |               |              |                       | hydroxyproline-rich glycoprotein family protein          |

**Table S4.** The expression levels of candidate genes in NPS004, NPS251, NPS040 and NPS096.

| Gene ID         | Low TSS content |        | High TSS content |        |
|-----------------|-----------------|--------|------------------|--------|
|                 | NPS004          | NPS251 | NPS040           | NPS096 |
| Glyma.06g146500 | 4.82            | 8.92   | 13.61            | 10.34  |
| Glyma.06g147600 | 12.05           | 20.19  | 28.61            | 27.74  |
| Glyma.06g148300 | 5.78            | 7.87   | 3.33             | 4.82   |
| Glyma.06g148600 | 10.84           | 16.26  | 8.33             | 8.62   |
| Glyma.06g148700 | 6.75            | 8.13   | 3.89             | 6.2    |
| Glyma.06g148800 | 21.69           | 9.44   | 32.63            | 29.64  |
| Glyma.06g148900 | 1.2             | 0.52   | 2.92             | 1.9    |
| Glyma.15g133700 | 4.58            | 4.2    | 1.11             | 1.72   |
| Glyma.15g134400 | 2.89            | 2.1    | 1.11             | 1.38   |
| Glyma.15g135100 | 10.12           | 11.54  | 13.47            | 12.06  |
| Glyma.15g135200 | 10.12           | 15.21  | 9.17             | 6.55   |

**Table S5.** The expression levels of candidate genes in14,21 and 28 DAF.

| Gene ID         | 14 DAF |       |       |       | 21 DAF |       |       |       | 28 DAF |       |       |       |
|-----------------|--------|-------|-------|-------|--------|-------|-------|-------|--------|-------|-------|-------|
|                 | I      | II    | III   | Mean  | I      | II    | III   | Mean  | I      | II    | III   | Mean  |
| Glyma.06g146500 | 20.93  | 23.14 | 16.55 | 20.2  | 20.71  | 20.36 | 11.93 | 17.67 | 13.22  | 12.95 | 10.95 | 12.38 |
| Glyma.06g147600 | 22.92  | 15.74 | 11.25 | 16.64 | 15.01  | 19.67 | 16.48 | 17.05 | 14.43  | 9.71  | 14.74 | 12.96 |
| Glyma.06g148300 | 17.94  | 12.5  | 10.92 | 13.78 | 6.99   | 8.97  | 8.52  | 8.16  | 6.01   | 8.09  | 4.63  | 6.25  |
| Glyma.06g148600 | 37.86  | 28.69 | 23.83 | 30.13 | 18.64  | 31.4  | 20.46 | 23.5  | 13.46  | 10.52 | 17.69 | 13.89 |
| Glyma.06g148700 | 20.93  | 16.2  | 14.56 | 17.23 | 9.84   | 20.53 | 3.98  | 11.45 | 7.23   | 10.52 | 5.48  | 7.74  |
| Glyma.06g148800 | 22.42  | 22.68 | 25.49 | 23.53 | 24.59  | 20.53 | 12.5  | 19.21 | 18.03  | 23.47 | 11.79 | 17.77 |
| Glyma.06g148900 | 8.97   | 2.31  | 4.63  | 5.31  | 3.36   | 2.76  | 3.98  | 3.37  | 4.81   | 3.27  | 2.11  | 3.4   |
| Glyma.15g133700 | 37.37  | 42.58 | 41.28 | 40.41 | 6.47   | 8.28  | 5.4   | 6.72  | 3.48   | 3.64  | 2.95  | 3.36  |
| Glyma.15g134400 | 87.47  | 87.38 | 87.4  | 87.42 | 9.83   | 8.98  | 5.68  | 8.16  | 4.03   | 4.45  | 3.94  | 4.14  |
| Glyma.15g135100 | 22.92  | 20.36 | 21    | 21.43 | 18.23  | 20.53 | 16.48 | 18.41 | 15.25  | 13.76 | 16.85 | 15.29 |
| Glyma.15g135200 | 2.49   | 5.96  | 5.09  | 4.51  | 8.82   | 9.32  | 8.28  | 8.81  | 10.17  | 9.71  | 12.64 | 10.84 |
